# Supplementary material
Source: Springer Nature journal article supplement (https://www.springermedizin.de/resource/supplementary/12885_2010_2567_MOESM5_ESM.pdf/9462580)
Supplement: MOESM5 [file 9462580]

**Nausea**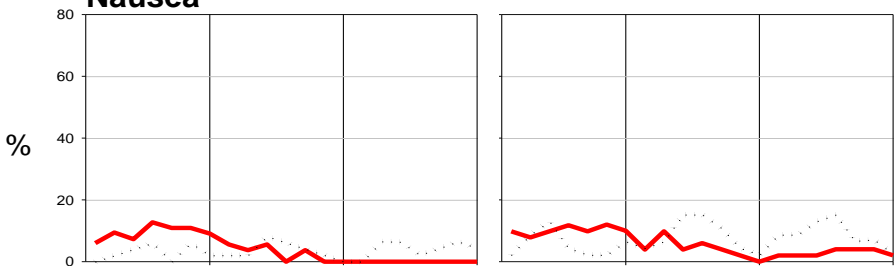**Insomnia**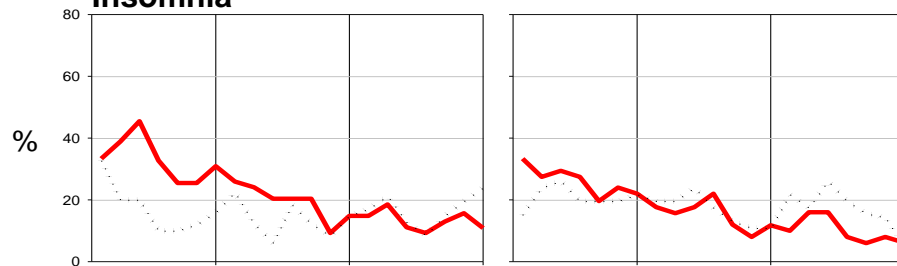**Vomiting**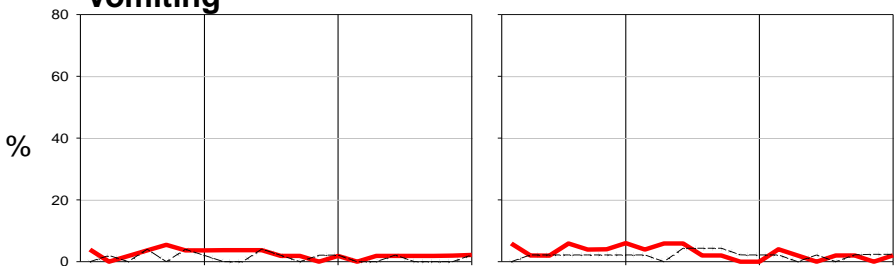**Mood**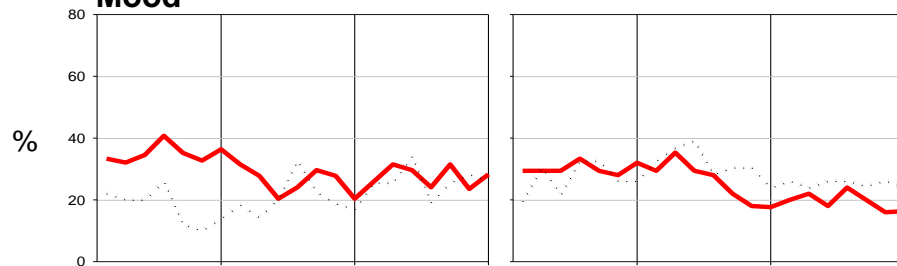**Loss of appetite**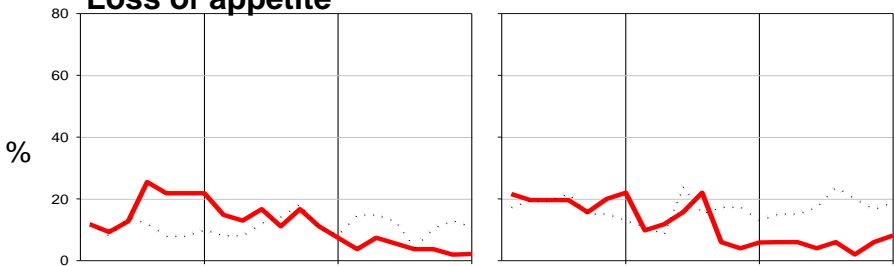**Overall condition**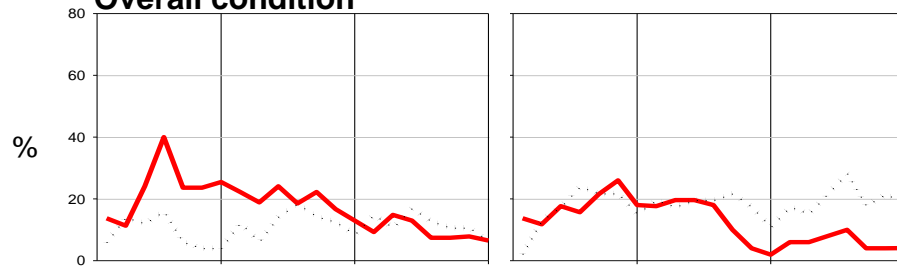**Pain**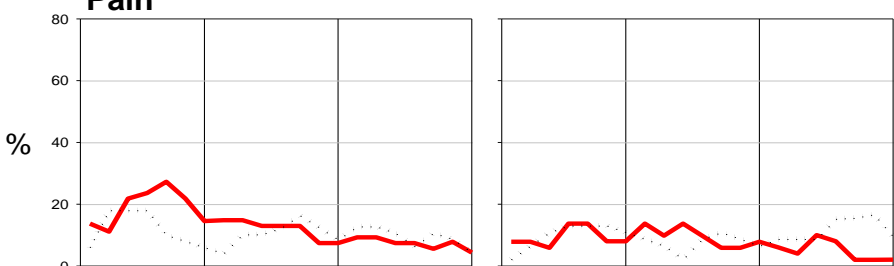**Physical activity**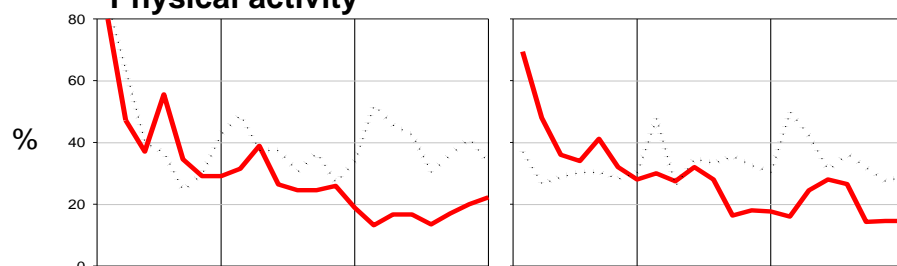

Week 1

Week 2

Week 3

Week 4

Week 5

Week 6

Week 1

Week 2

Week 3

Week 4

Week 5

Week 6

— 3-weekly    ... Weekly
